# Supplementary material for: Bis-EDOT end capped by n-hexyl or n-hexylsulfanyl groups: the effect of the substituents on the stability of the oxidized states
Source: Royal Society of Chemistry journal article supplement (doi:10.1039/c4nj01684j), 2014-11-07

## **Bis - EDOT end capped by n-hexyl or n-hexylsulfanyl groups: Effect of the substituents on the stability of the oxidized states**

Mathieu Turbiez<sup>b</sup>, Djibril Faye,<sup>a</sup> Philippe Leriche,<sup>a</sup> and Pierre Frère<sup>a\*</sup>

a) University of Angers, MOLTECH-Anjou UMR CNRS 6200, 2 boulevard Lavoisier, 49045 Anger cedex, France

b) BASF Scheiwz AG, Schwarzwaldallee 215, CH-4002 Basel, Switzerland

### **Supplementary information**

Table of contents

|                                                                                      |              |
|--------------------------------------------------------------------------------------|--------------|
| <b><sup>1</sup>H NMR and <sup>13</sup>C NMR for compound EEb</b>                     | <b>2-3</b>   |
| <b><sup>1</sup>H NMR and <sup>13</sup>C NMR for compound EEc</b>                     | <b>4-5</b>   |
| <b>Figure S1</b>                                                                     | <b>6</b>     |
| <b>Calculated HOMOs and LUMOs EEa, EEb and EEc and calculated HOMOs of dications</b> | <b>7 - 9</b> |

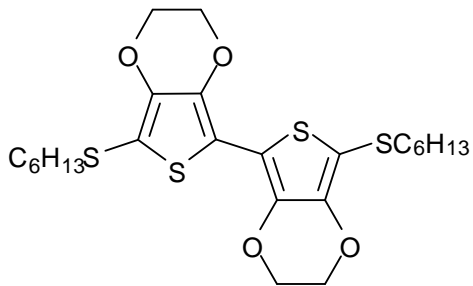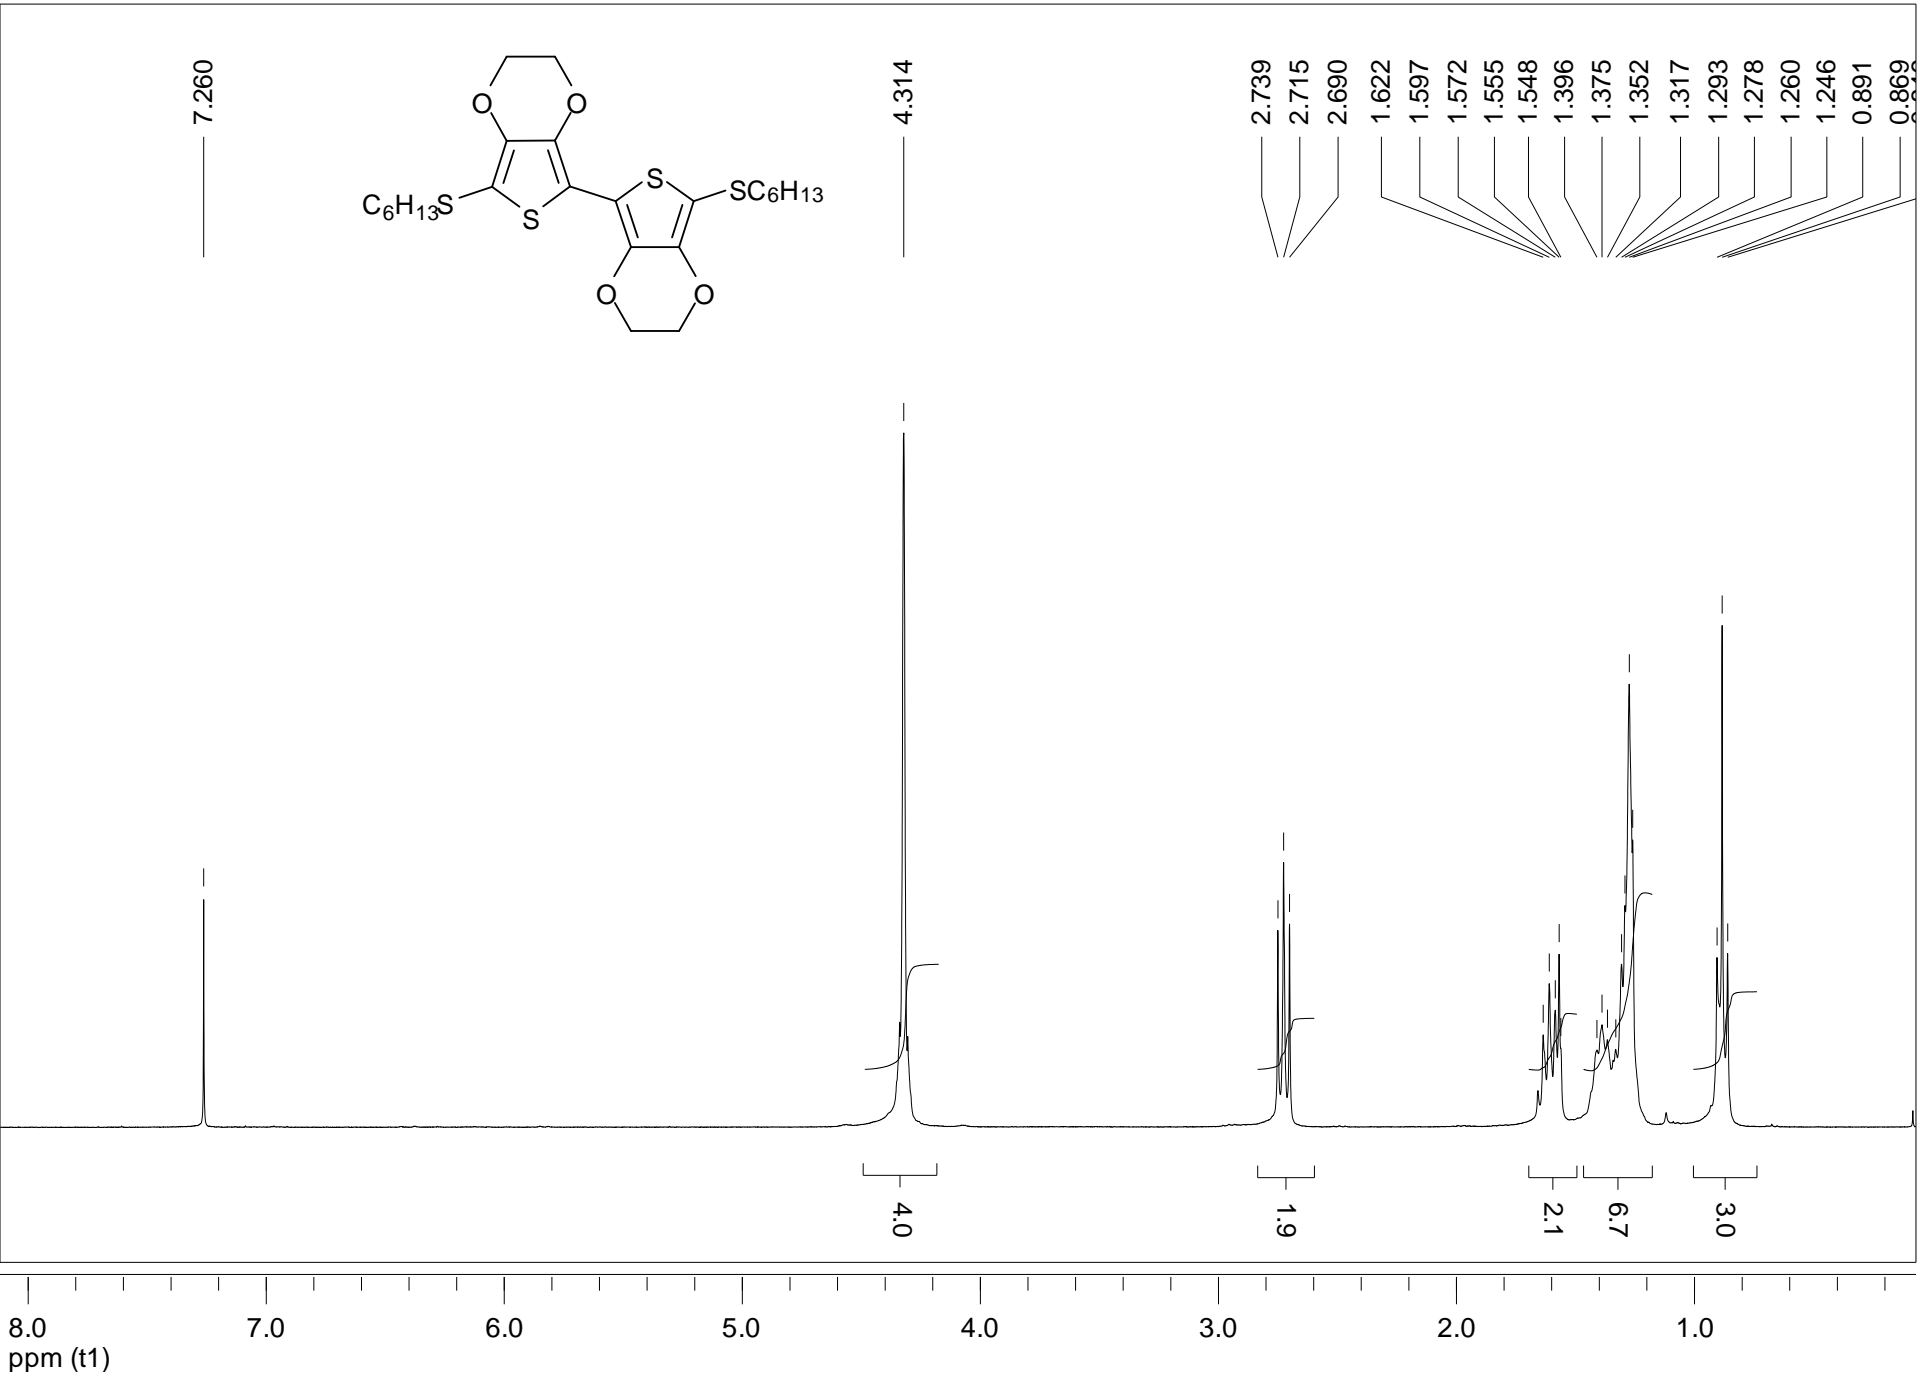

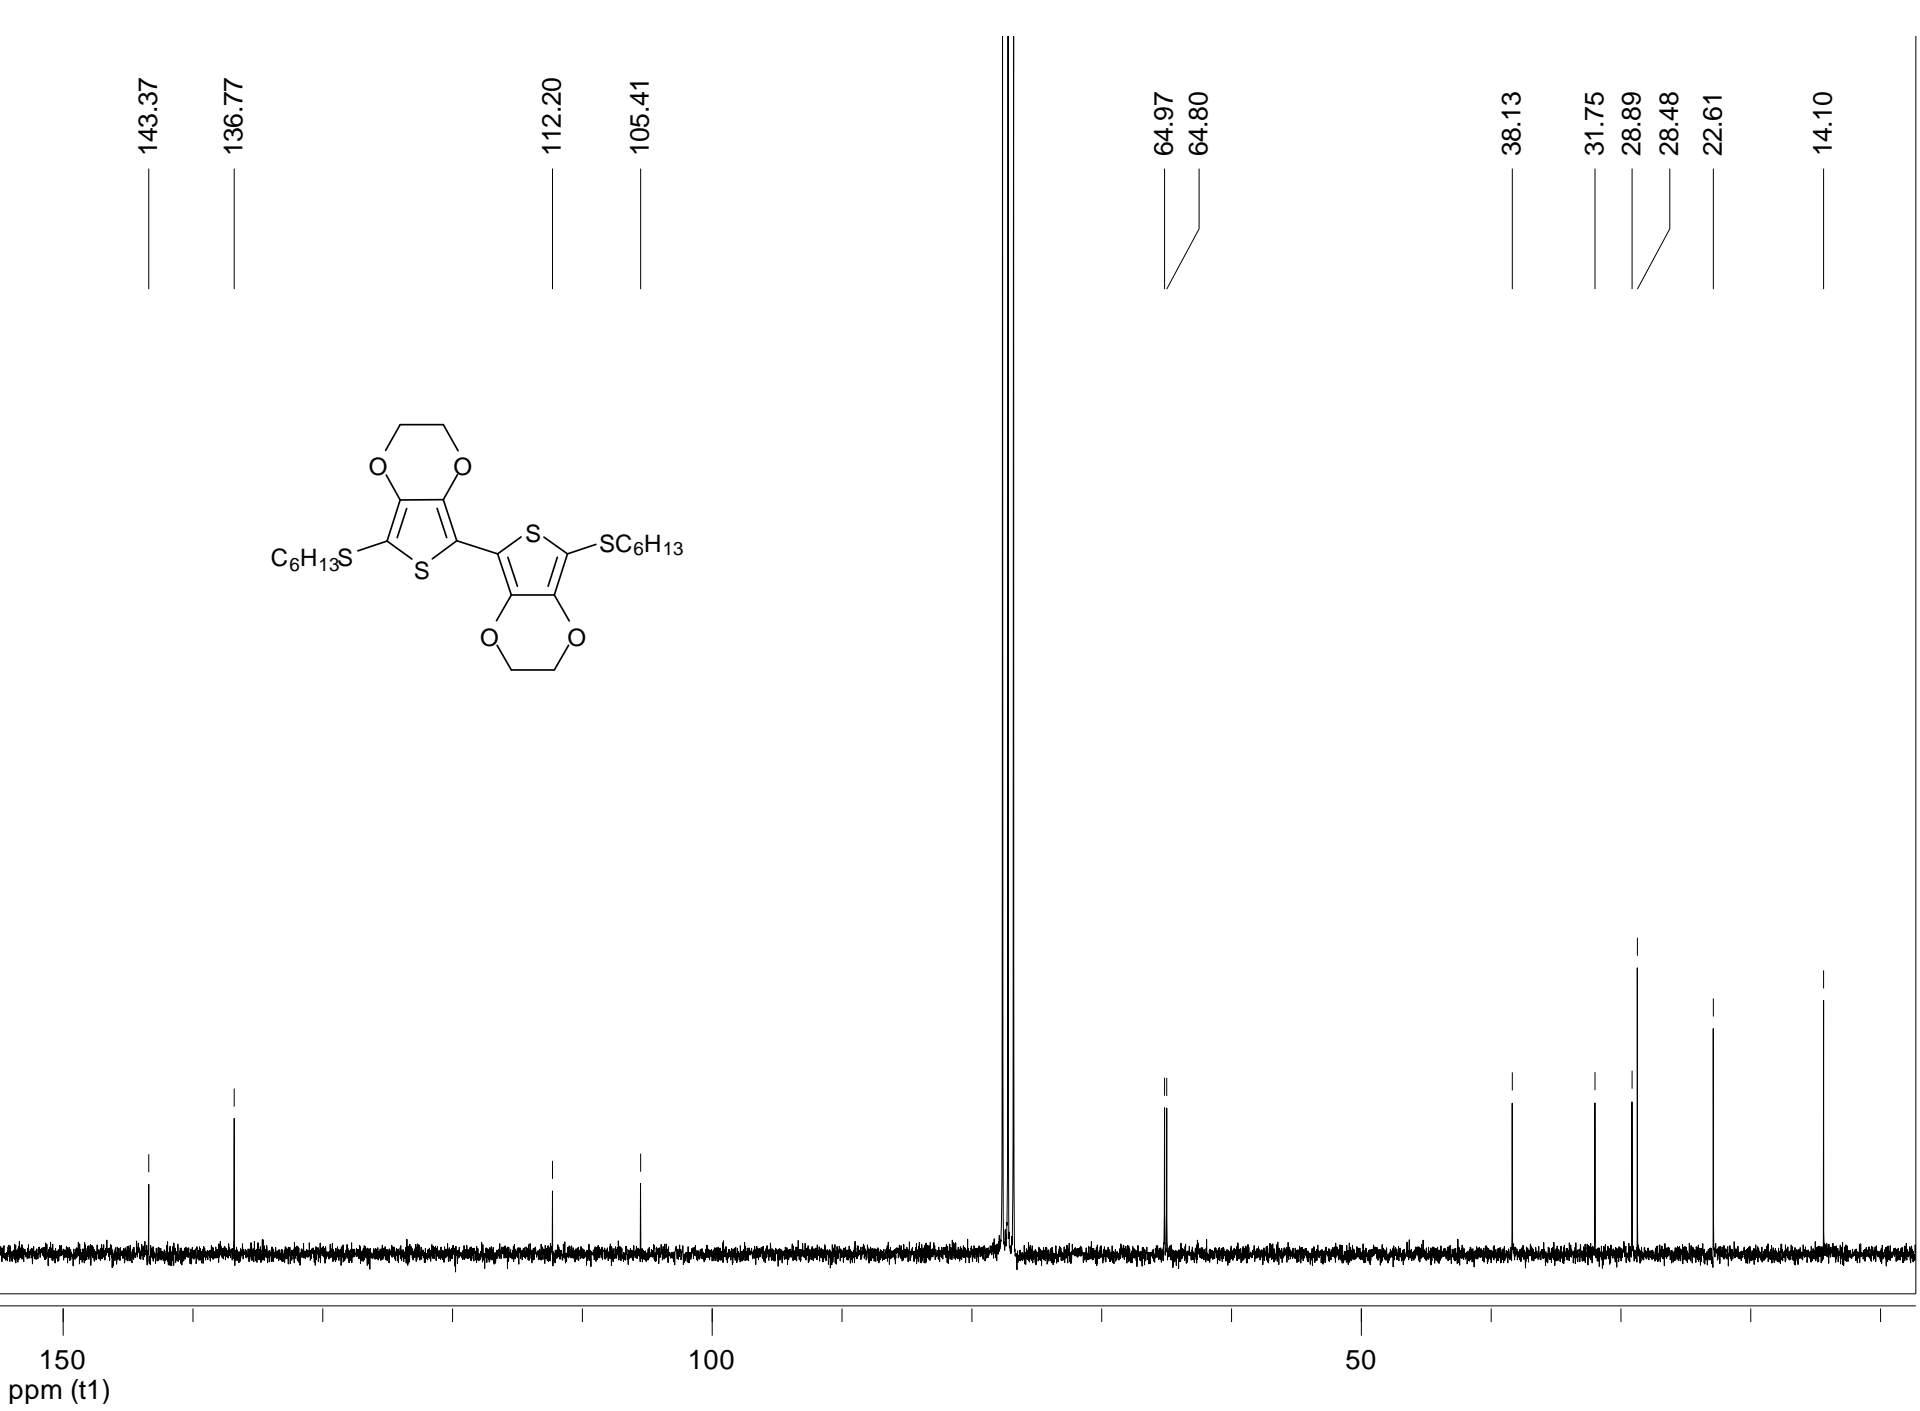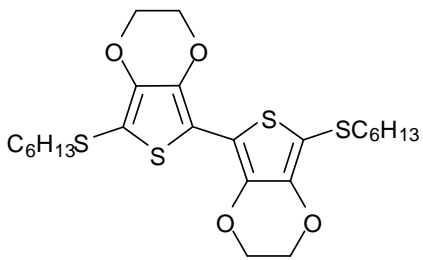

150  
ppm (t1)

100

50

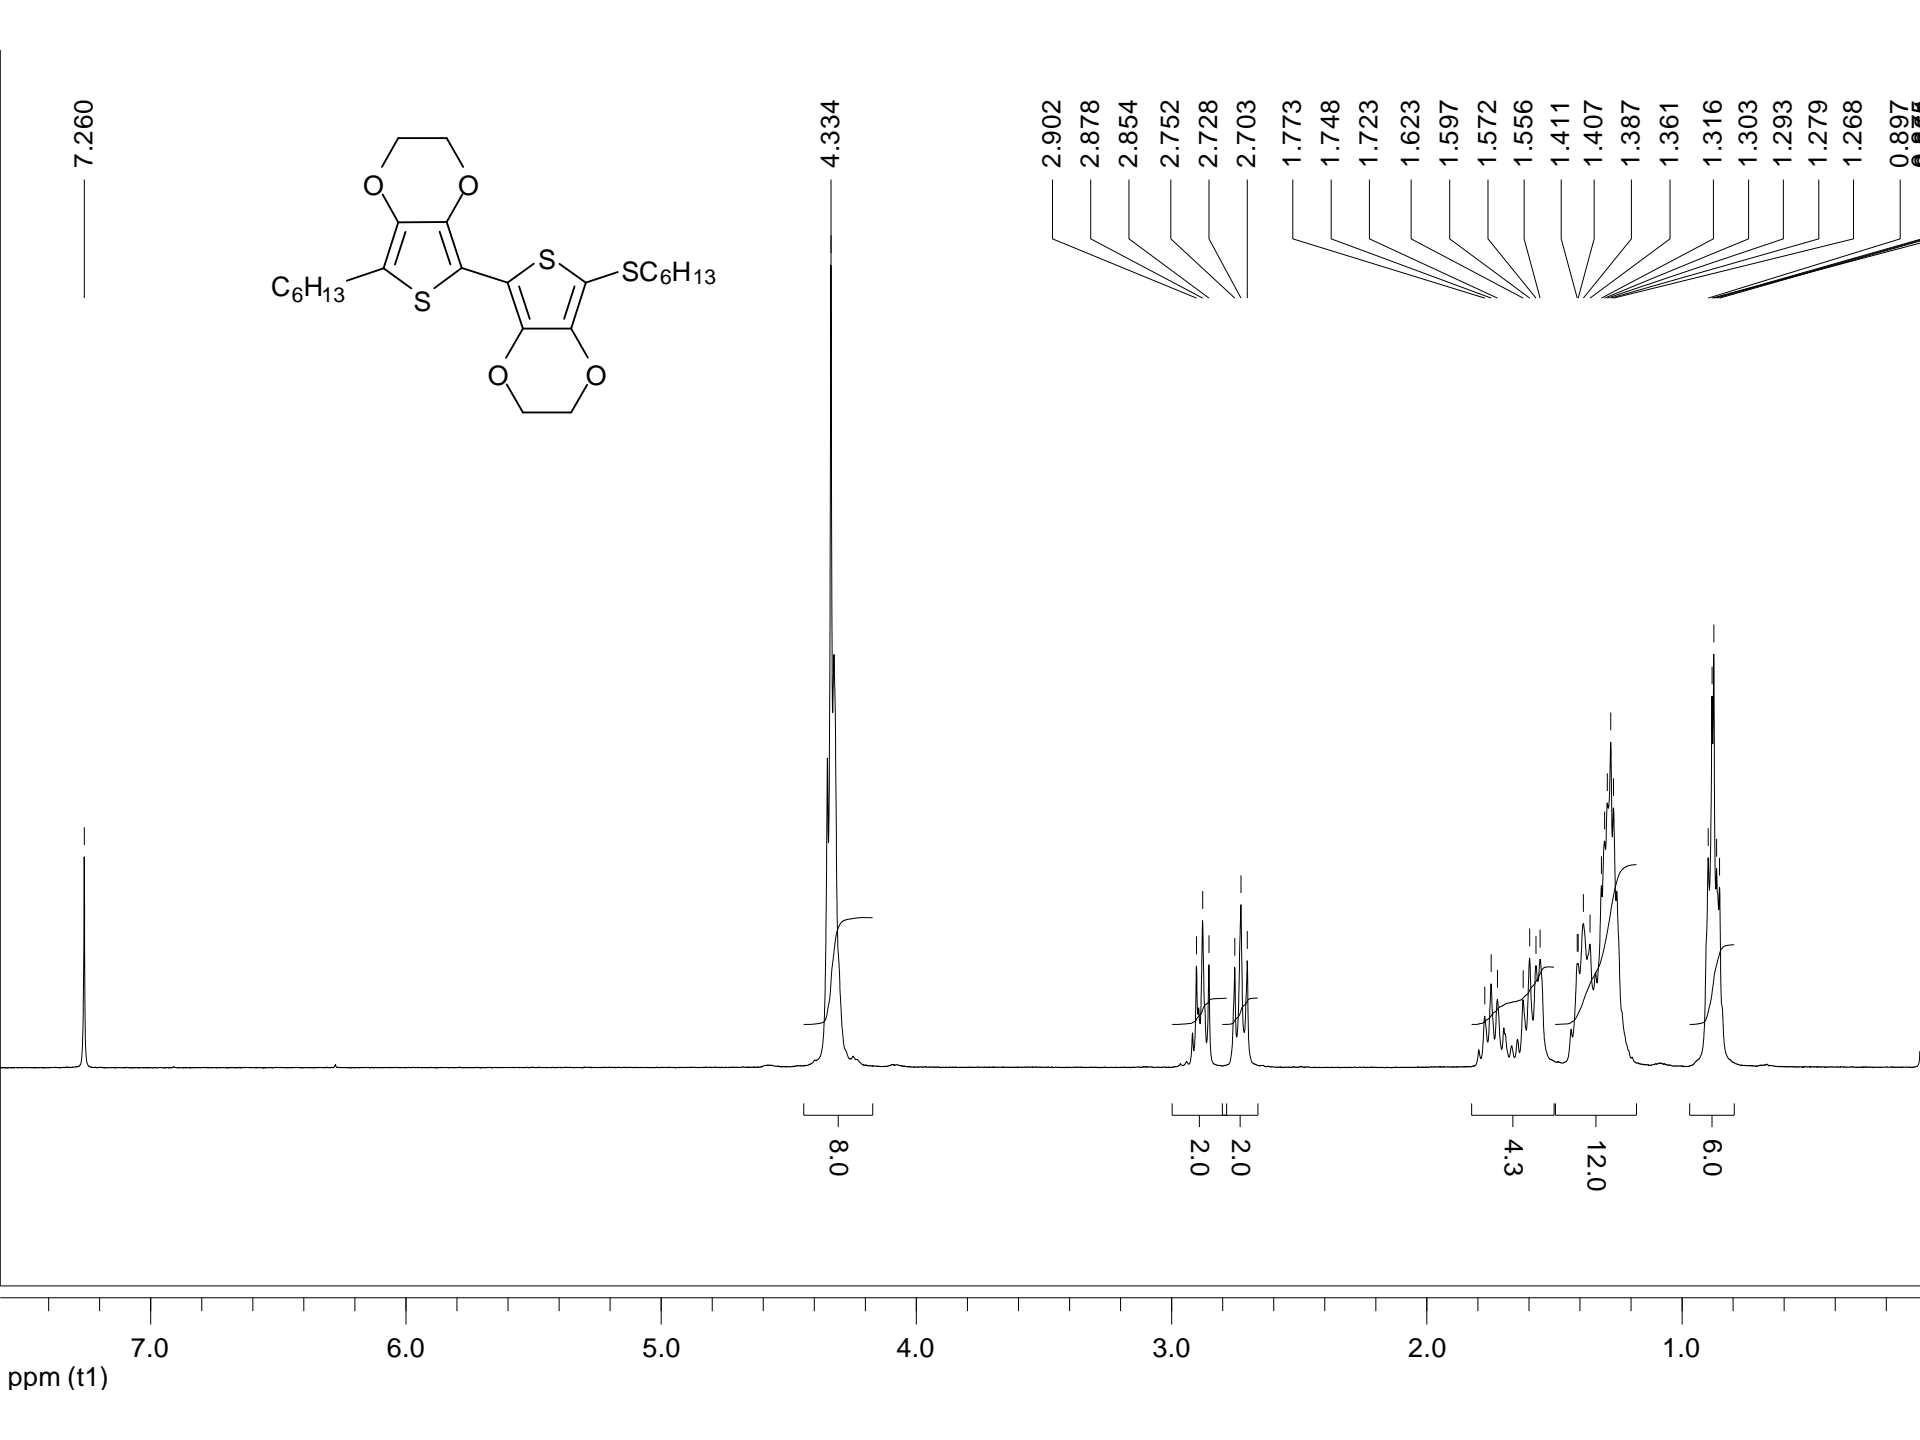

144.19  
143.27  
137.34  
136.60

114.49  
111.87  
107.30  
106.37

65.07  
64.95  
64.85  
64.71

39.35  
38.07  
31.43  
31.39  
29.53  
28.88  
28.30  
28.20  
22.56  
14.08

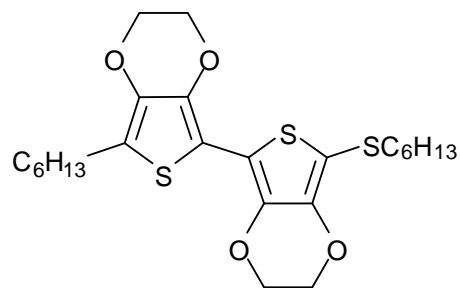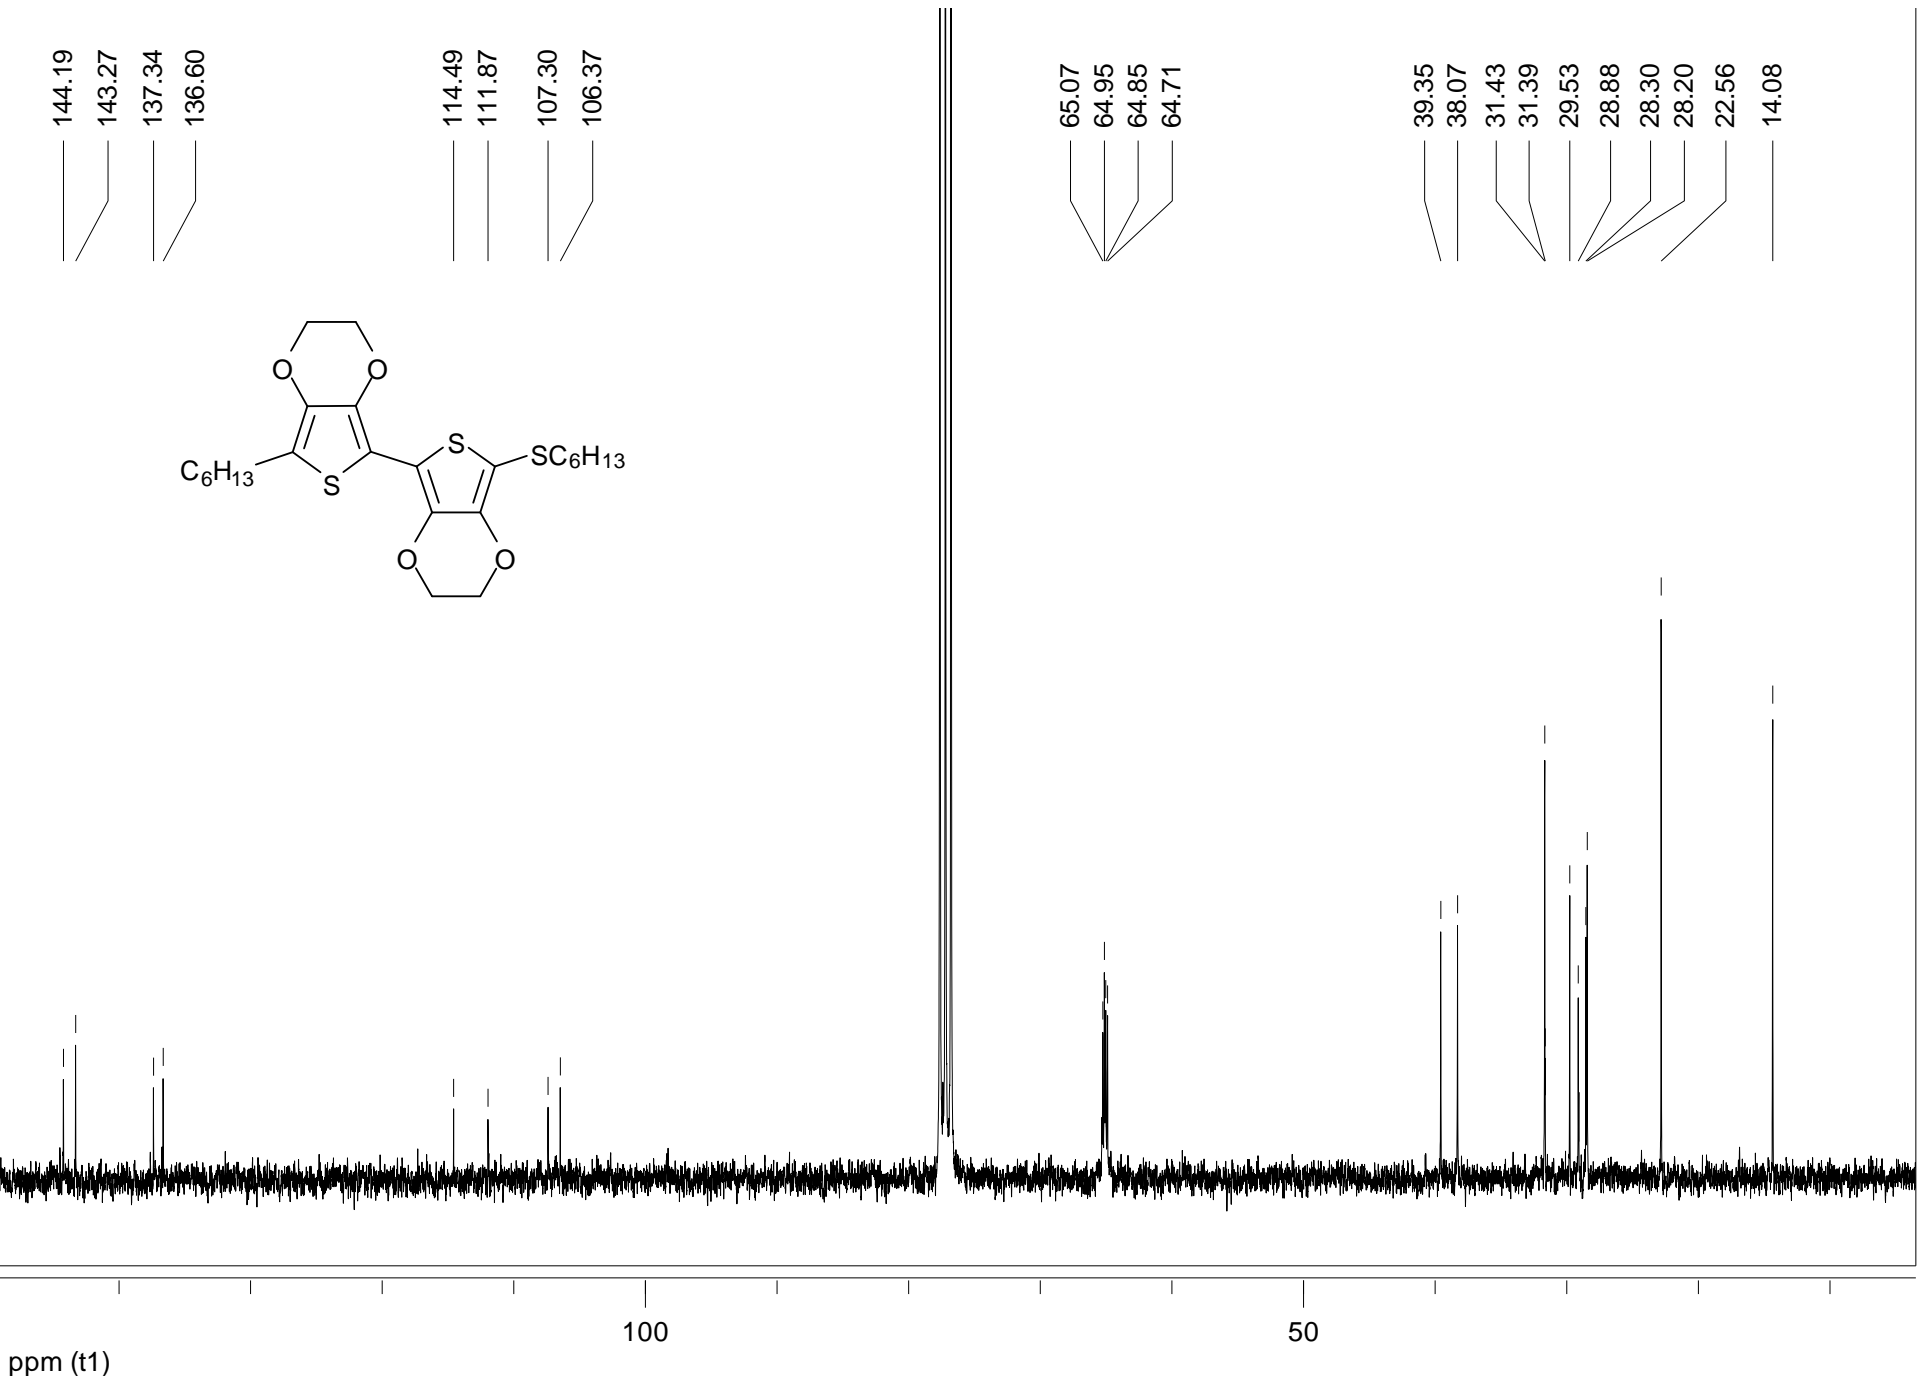

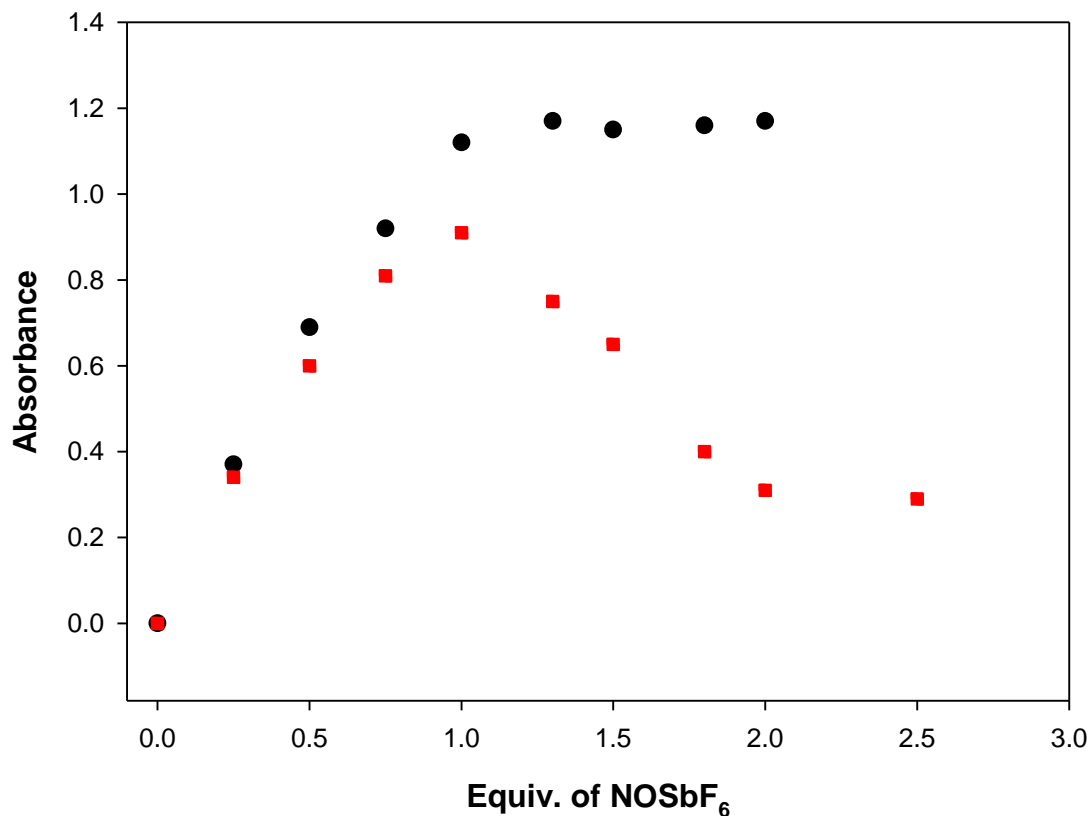

**Figure S1** : Evolution of absorbance at  $\lambda = 440$  nm ( $A_{440}$  black circle) for **EEa**  $10^{-4}$  M in  $\text{CH}_2\text{Cl}_2$  and at  $\lambda = 510$  nm ( $A_{510}$  red square) for **EEb**  $10^{-4}$  M in  $\text{CH}_2\text{Cl}_2$  during the stepwise addition of  $\text{NOSbF}_6$

$\text{NOSbF}_6$  ( $10^{-2}$  M in  $\text{CH}_3\text{CN}$ ) was added with a microsyringe to 5mL of **EEa** or **EEb** solution  $10^{-4}$  M in  $\text{CH}_2\text{Cl}_2$ . 1 equivalent of  $\text{NOSbF}_6$  corresponds to 50  $\mu\text{L}$  of oxidant solution.

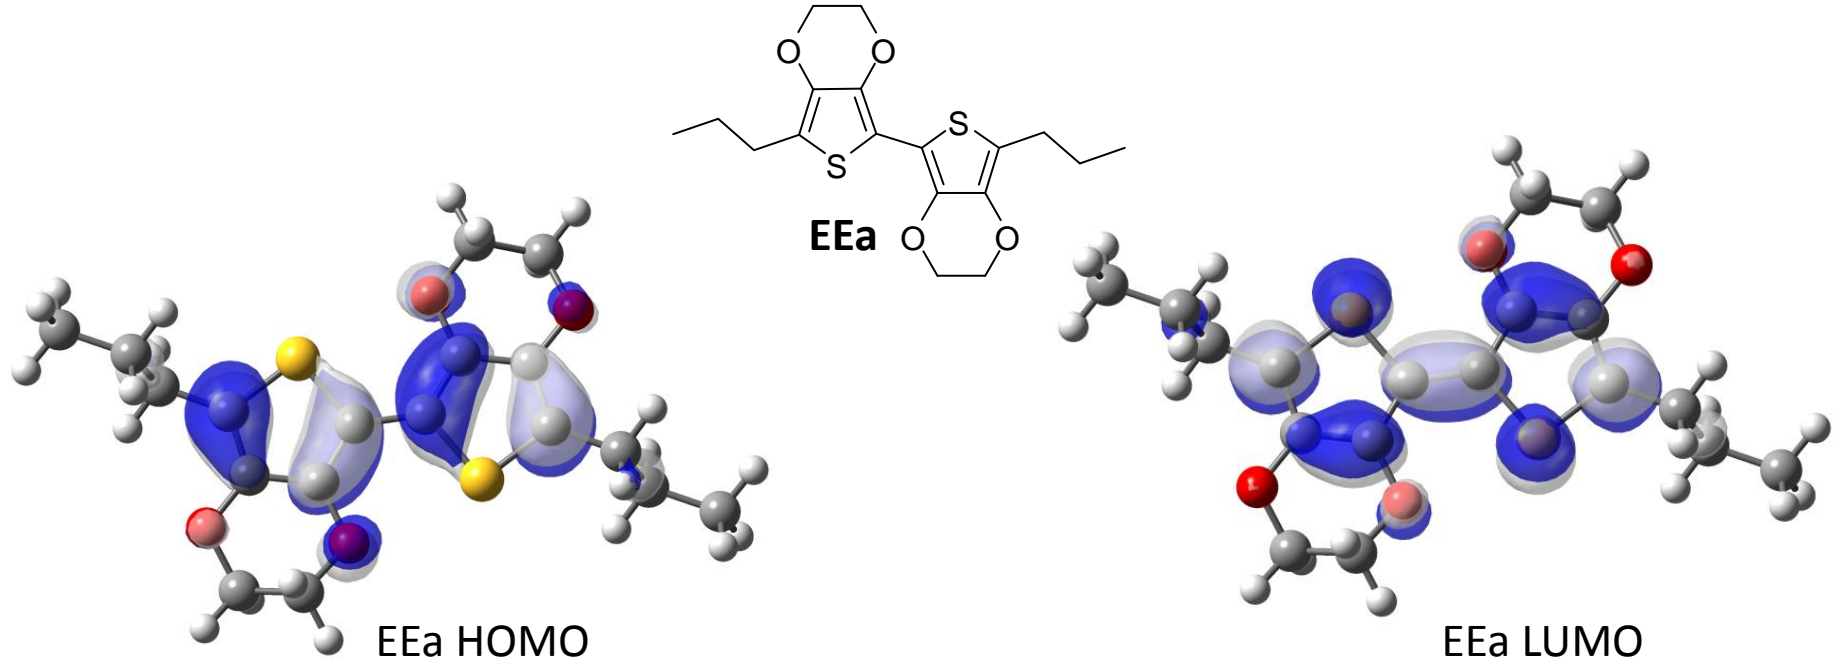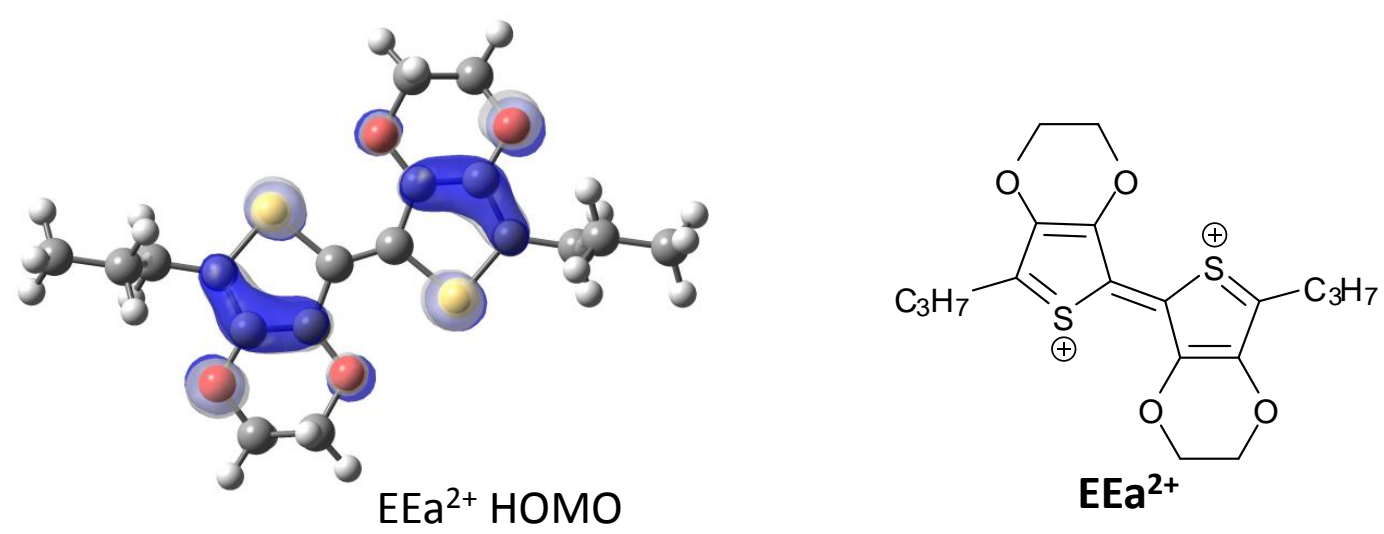

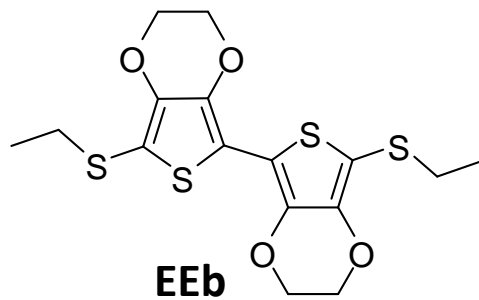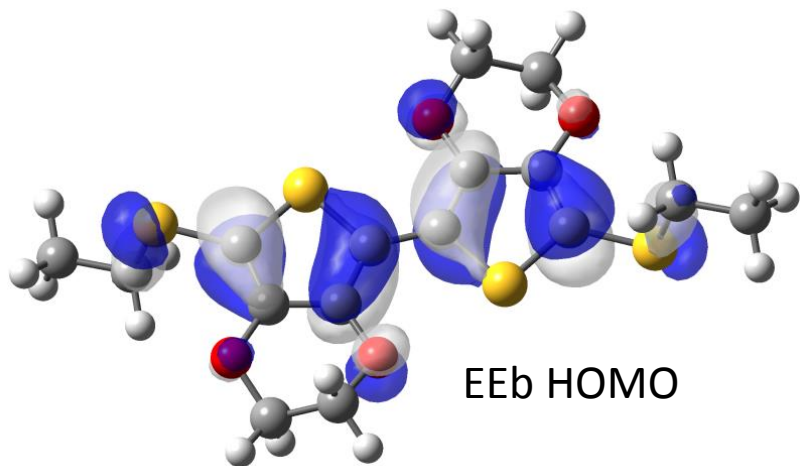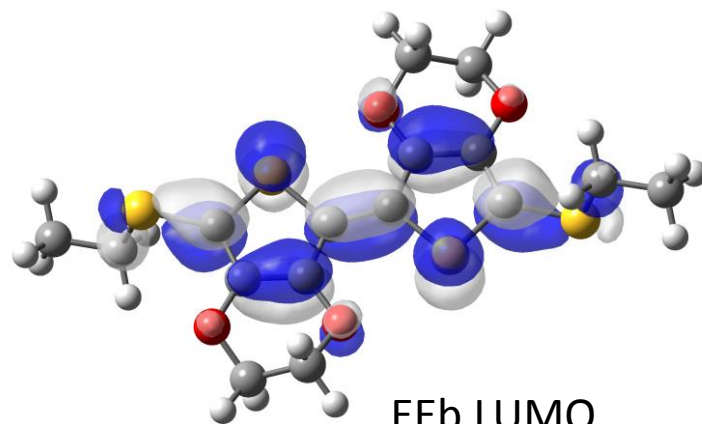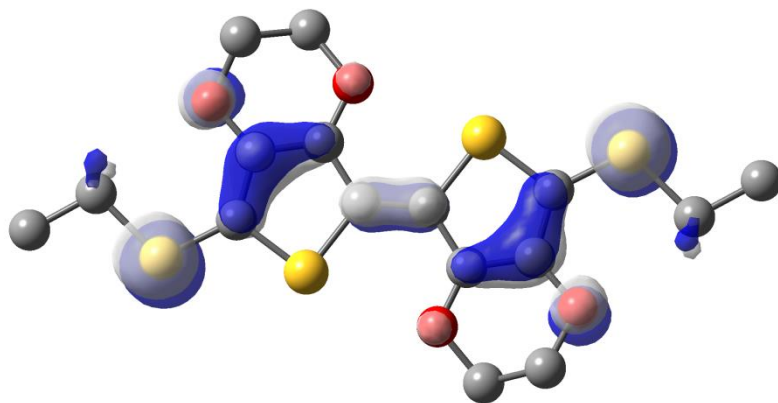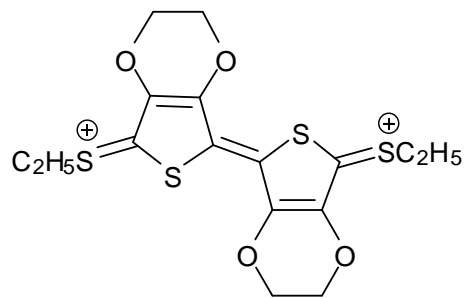



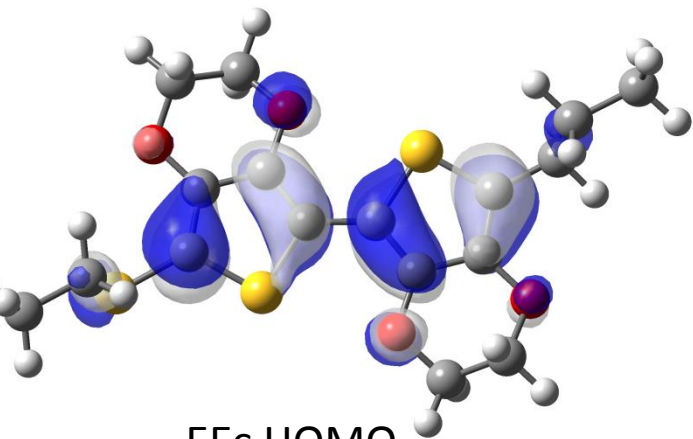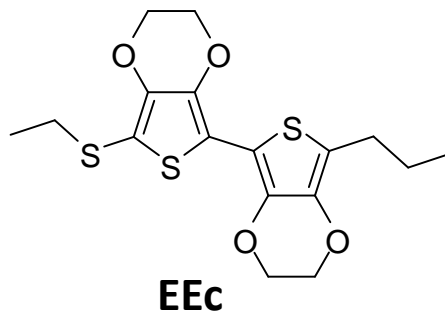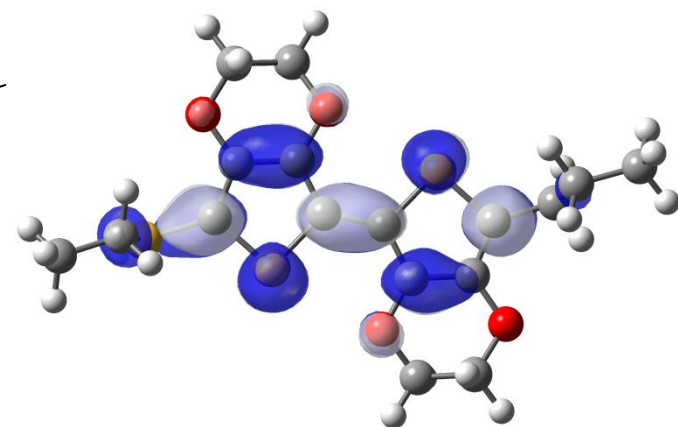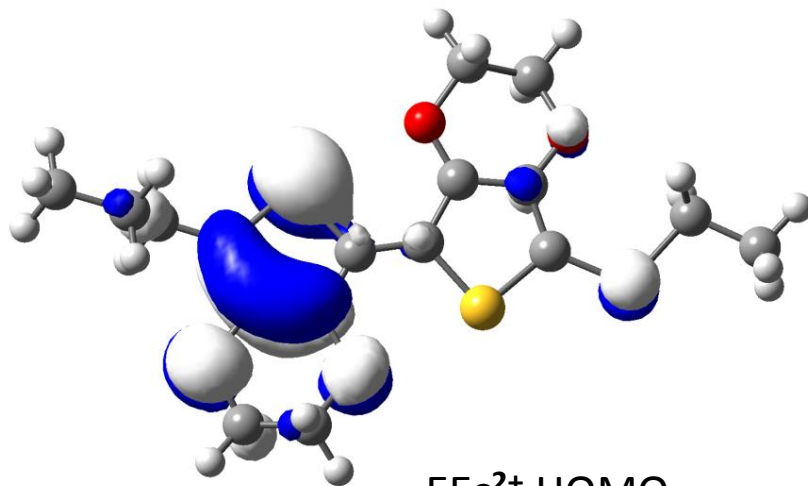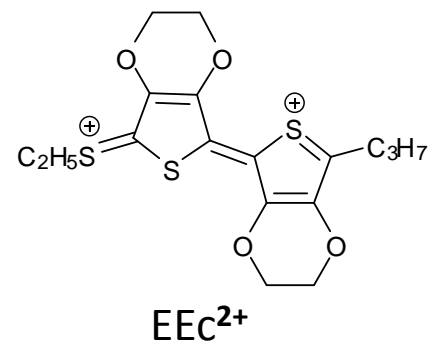

Supplement: c4nj01684j1.pdf [file c4nj01684j1.pdf]
